# Supplementary material for: Novel Carbonaceous Adsorbents Prepared from Glycerin Waste and Dopamine for Gas Separation
Source: MDPI journal article supplement (doi:10.3390/molecules28104071), 2023-05-13
Supplement: s1 [file s1]

## **Supporting Information**

### **Novel carbonaceous adsorbents prepared from glycerin waste and dopamine for gas separation**

Mary Batista<sup>1</sup>, Renato Carvalho<sup>2</sup>, Moisés L. Pinto<sup>3</sup>, João Pires<sup>1,\*</sup>

<sup>1</sup>CQE, Centro de Química Estrutural, Institute of Molecular Sciences, Departamento de Química e Bioquímica, Faculdade de Ciências, Universidade de Lisboa, Campo Grande, 1749-016

Lisboa, Portugal

<sup>2</sup>IBEROL, Sociedade Ibérica de Biocombustíveis e Oleaginosas, S.A., 2600-531

Alhandra, Portugal

<sup>3</sup>CERENA, Departamento de Engenharia Química, Instituto Superior Técnico, Universidade de Lisboa, 1049-001 Lisboa, Portugal

\* *Correspondence*: jpsilva@ciencias.ulisboa.pt

**Section S1. Synthesis of the glycerin-dopamine carbon materials.**

**Section S2. Adsorption apparatus for the adsorption of ethane, ethylene, carbon dioxide and methane at pressures up to 5 bar.**

**Section S3. FTIR and SEM for glycerol-dopamine carbonized.**

**Section S4. Selectivity values and X-Y diagrams in the Gdop0.75 for the separation of ethylene/carbon dioxide.**

**Section S5. SEM for the sample Gdop0.75**

## Section S1. Synthesis of the glycerin-dopamine carbon materials.

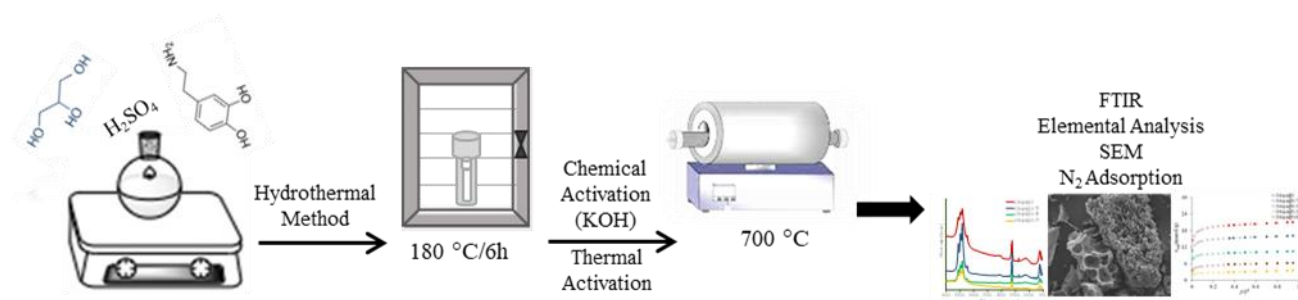

**Figure S1.** Schematic illustration of the preparation of glycerin-dopamine carbon materials.

**Section S2. Adsorption apparatus for the adsorption of ethane, ethylene, carbon dioxide and methane at pressures up to 5 bar.**

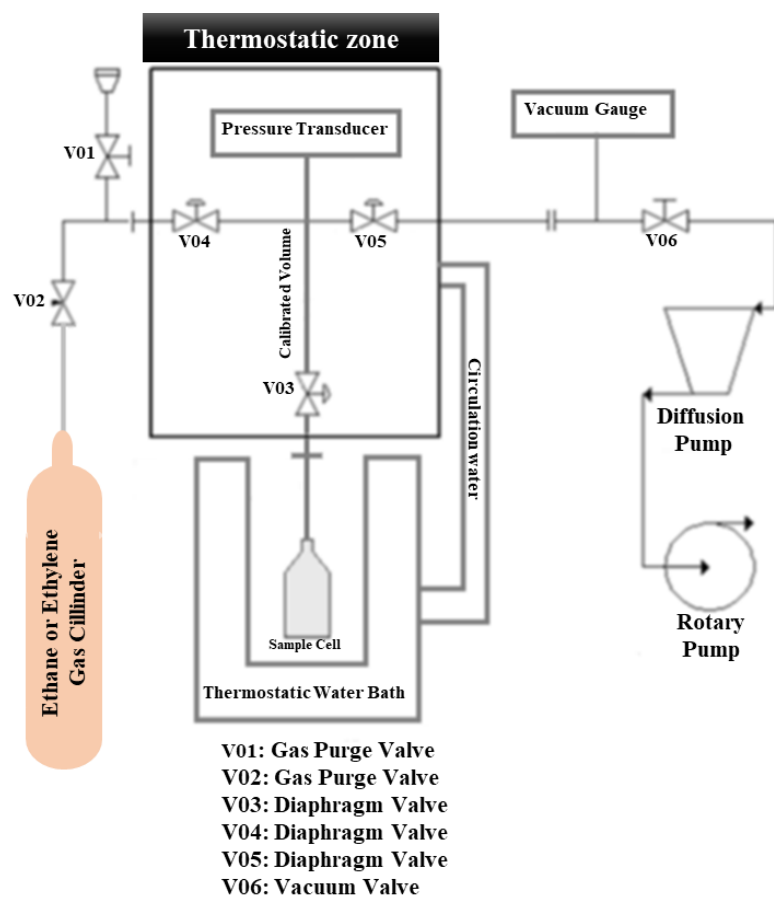

**Figure S2.** Gas adsorption system (used for the determination of adsorption isotherms at high-pressure).

### Section S3. FTIR and SEM for glycerin-dopamine *carbonized*.

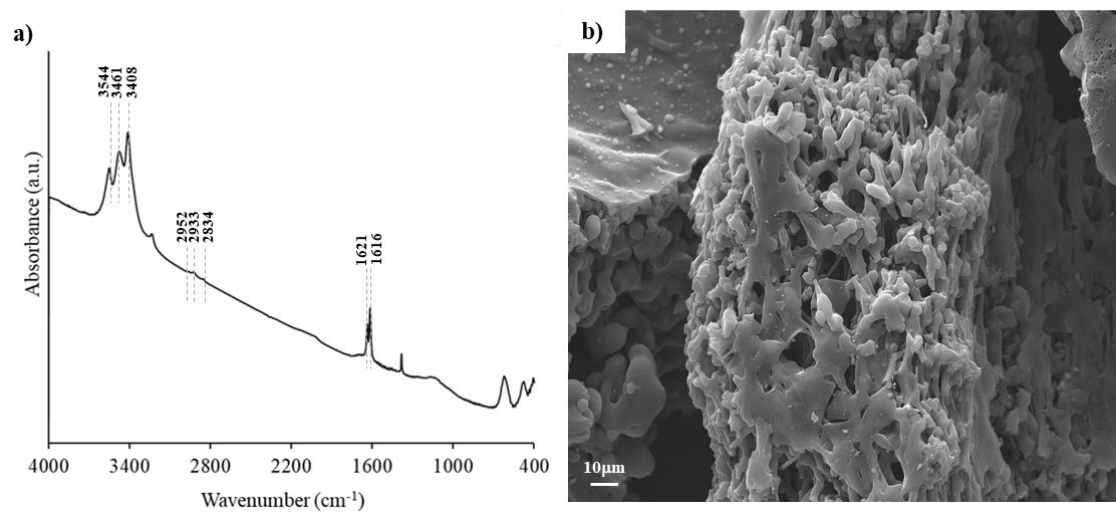

**Figure S3.** (a) FTIR spectra and (b) SEM image of the glycerol-dopamine *carbonized* (GdopC).

**Section S4. Selectivity values and X-Y diagrams in the Gdop0.75 for the separation of ethylene/carbon dioxide.**

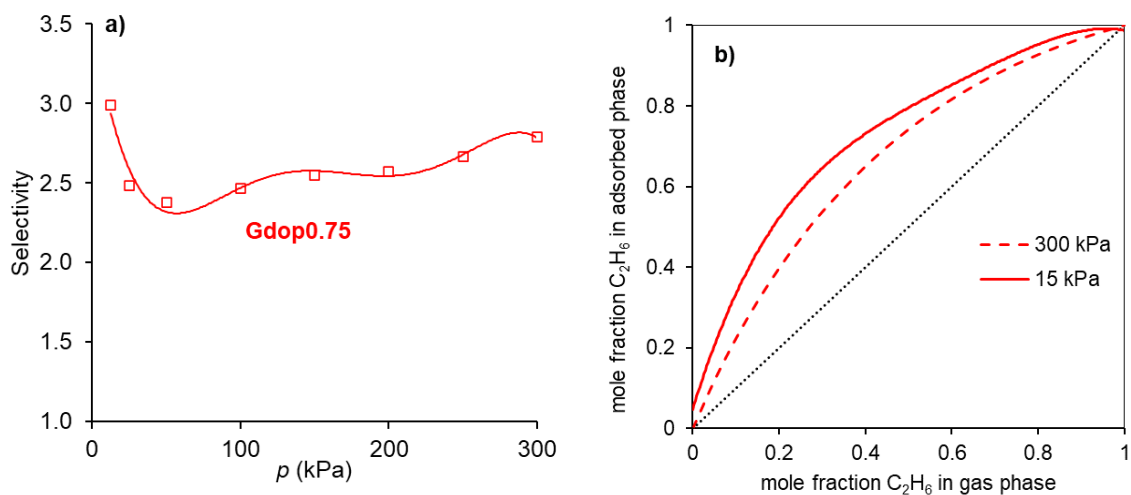

**Figure S4.** (a) Selectivity values and (b) X-Y diagrams in the Gdop0.75 for the separation of ethylene/carbon dioxide, estimated by the Ideal Adsorbed Solution Theory (IAST).

**Section S5. SEM for the sample Gdop0.75**

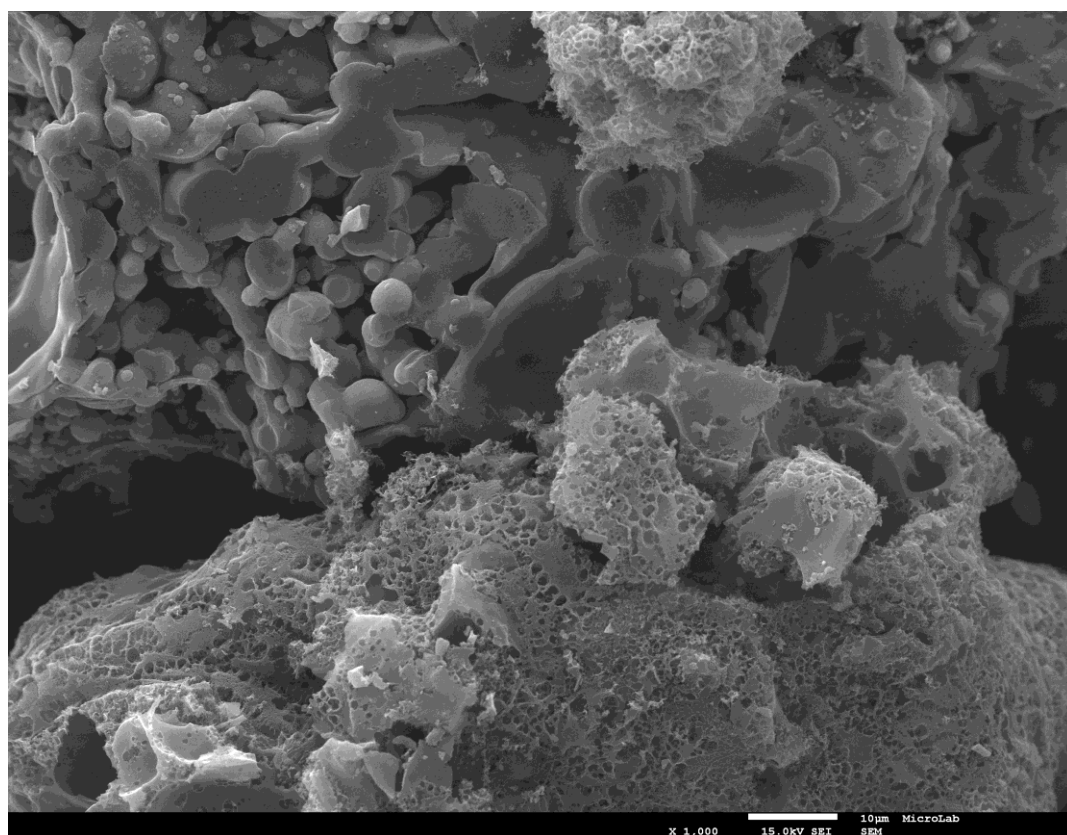

**Figure S5.** SEM for the sample Gdop0.75.
